# Supplementary material for: The effects of nano-curcumin as a nutritional strategy on clinical and inflammatory factors in children with cystic fibrosis: the study protocol for a randomized controlled trial
Source: PubMed Central journal article supplement (PMC8056493; doi:10.1186/s13063-021-05224-6), 2021-04-20
Supplement: 13063_2021_5224_MOESM1_ESM.pdf [file 13063_2021_5224_MOESM1_ESM.pdf]

|                                                                                                                                                                                                                                                                                                                                                                                                                                                                                                                                                                                                                                                                                                                                                                                                                                                                                            |                                                |
|--------------------------------------------------------------------------------------------------------------------------------------------------------------------------------------------------------------------------------------------------------------------------------------------------------------------------------------------------------------------------------------------------------------------------------------------------------------------------------------------------------------------------------------------------------------------------------------------------------------------------------------------------------------------------------------------------------------------------------------------------------------------------------------------------------------------------------------------------------------------------------------------|------------------------------------------------|
| نام مجری یا مجریان طرح:                                                                                                                                                                                                                                                                                                                                                                                                                                                                                                                                                                                                                                                                                                                                                                                                                                                                    | عنوان طرح پژوهشی:                              |
|                                                                                                                                                                                                                                                                                                                                                                                                                                                                                                                                                                                                                                                                                                                                                                                                                                                                                            | معرفی پژوهش                                    |
|                                                                                                                                                                                                                                                                                                                                                                                                                                                                                                                                                                                                                                                                                                                                                                                                                                                                                            | مزایا                                          |
|                                                                                                                                                                                                                                                                                                                                                                                                                                                                                                                                                                                                                                                                                                                                                                                                                                                                                            | خطرات                                          |
|                                                                                                                                                                                                                                                                                                                                                                                                                                                                                                                                                                                                                                                                                                                                                                                                                                                                                            | جبران خطرات                                    |
|                                                                                                                                                                                                                                                                                                                                                                                                                                                                                                                                                                                                                                                                                                                                                                                                                                                                                            | نمونه گیری، دارودرمانی یا سایر خدمات (ذکر شود) |
|                                                                                                                                                                                                                                                                                                                                                                                                                                                                                                                                                                                                                                                                                                                                                                                                                                                                                            | محرمانه بودن                                   |
|                                                                                                                                                                                                                                                                                                                                                                                                                                                                                                                                                                                                                                                                                                                                                                                                                                                                                            | پاسخگویی به پرسشها                             |
| شرکت من در مطالعه کاملاً اختیاری است و آزاد خواهیم بود که از شرکت در مطالعه امتناع نموده یا هر زمان مایل بودم بدون آنکه تغییری در نحوه رفتار پزشک درمانگر یا نحوه درمان و مراقبت از بیماری اینجانب ایجاد شود از پژوهش مذکور خارج شوم.                                                                                                                                                                                                                                                                                                                                                                                                                                                                                                                                                                                                                                                      | حق انصراف در خروج از مطالعه                    |
| <p style="text-align: center;"><b>((رضایت))</b></p> <p>اینجانب با آگاهی کامل از موارد فوق رضایت میدهم که به عنوان یک فرد مورد مطالعه در پژوهش به سرپرستی شرکت نمایم .</p> <p>کلیه اطلاعاتی که از من گرفته میشود و نیز نام من محرمانه باقی خواهد ماند و نتایج تحقیقات به صورت کلی و در قالب اطلاعات گروه مورد مطالعه منتشر میگردد و نتایج فردی در صورت نیاز بدون ذکر نام و مشخصات فردی عرضه خواهد گردید و همچنین برائت پزشک یا پزشکان این طرح را از کلیه اقدامات مذکور در برگه اطلاعاتی در صورت عدم تقصیر در ارائه اقدامات اعلام میدارم.</p> <p>این موافقت مانع از اقدامات قانونی اینجانب در مقابل <b>(نام واحد ذکر گردد)</b> در صورتی که عملی خلاف و غیر انسانی انجام شود نخواهد بود.</p> <p style="text-align: right;">امضاء و اثر انگشت فرد مورد پژوهش<br/>امضاء پژوهشگر<br/>آدرس و شماره تماس بیمار حتما ذکر گردد:</p> <p style="text-align: left;">نام و نام خانوادگی و امضاء شاهد</p> |                                                |
